# Supplementary material for: Hyperinflammatory Immune Response in COVID-19: Host Genetic Factors in Pyrin Inflammasome and Immunity to Virus in a Spanish Population from Majorca Island
Source: MDPI journal article supplement (doi:10.3390/biomedicines11092548), 2023-09-16
Supplement: s1 [file s1]

| Patients | Age | Sex | Severe/<br>Critical | Comorbidities |            |          |              | Laboratory data     |                    |              |              |                                 |      |             |       |       |        |        |       |       | Genetic risk markers |                            |                               |
|----------|-----|-----|---------------------|---------------|------------|----------|--------------|---------------------|--------------------|--------------|--------------|---------------------------------|------|-------------|-------|-------|--------|--------|-------|-------|----------------------|----------------------------|-------------------------------|
|          |     |     |                     | Obesity       | Dyslipemia | Diabetes | Hypertension | Ferritin<br>(ng/mL) | D dimer<br>(ng/mL) | LDH<br>(U/L) | AST<br>(U/L) | Lymph.<br>counts<br>(x 10^3/uL) | NLR  | Cytopenias  | IL-6  | IL-10 | IL-1 β | IL-1Ra | IL-18 | sCD25 | <i>MEFV</i><br>AA/AA | <i>IFNAR2</i><br>p.Phe8Ser | <i>CARMIL2</i><br>p.Val181Met |
| HP-1     | 61  | M   | 3                   | No            | No         | Yes      | Yes          | 2109                | 2332               | 434          | 20           | 0,25                            | 12,5 | L, A, T     | N.A   | N.A   | N.A    | N.A    | N.A   | N.A   | 2                    | 0                          | 0                             |
| HP-2     | 70  | M   | 3                   | No            | No         | Yes      | Yes          | 3801                | 3588               | 713          | 48           | 0,3                             | 15,3 | L, A        | N.A   | N.A   | N.A    | N.A    | N.A   | N.A   | 1                    | 0                          | 0                             |
| HP-3     | 63  | M   | 3                   | No            | Yes        | Yes      | Yes          | 435                 | 3330               | 553          | 42           | 0,38                            | 15,9 | L, A        | 5,6   | 25,2  | 5,2    | 24,2   | 35,1  | 892   | 2                    | 0                          | 0                             |
| HP-4     | 56  | M   | 3                   | Yes           | No         | Yes      | No           | 1107                | 3398               | 412          | 98           | 0,59                            | 10,9 | L, A, T     | N.A   | N.A   | N.A    | N.A    | N.A   | N.A   | 2                    | 0                          | 0                             |
| HP-5     | 53  | M   | 3                   | Yes           | Yes        | No       | No           | 2872                | 2821               | 528          | 108          | 0,31                            | 29,7 | L, A        | 1149  | 21    | 0,6    | 40,5   | 47,6  | N.A   | 0                    | 0                          | 0                             |
| HP-6     | 65  | M   | 3                   | No            | Yes        | No       | Yes          | 2540                | 2034               | 359          | 85           | 0,2                             | 43,0 | L, A, T     | 89,4  | 63,1  | 8,3    | 15,3   | 19,7  | 2886  | 0                    | 1                          | 0                             |
| HP-7     | 65  | M   | 2                   | No            | No         | No       | No           | 2731                | 679                | 381          | 40           | 0,81                            | 15,4 | L, A        | 175   | 46,5  | 1,7    | 58,4   | 73,5  | 746   | 2                    | 0                          | 0                             |
| HP-8     | 64  | M   | 3                   | No            | No         | No       | No           | 3168                | 16269              | 410          | 174          | 0,53                            | 16,8 | L, A        | 189   | 81,5  | 23,5   | 35,2   | 120   | 1167  | 2                    | 0                          | 0                             |
| HP-9     | 65  | F   | 3                   | No            | No         | No       | Yes          | 1683                | 647                | 532          | 78           | 0,34                            | 6,4  | L, A, N     | 43,5  | 13    | 12,8   | 68,7   | 47    | N.A   | 0                    | 2                          | 0                             |
| HP-10    | 66  | M   | 2                   | No            | No         | No       | No           | 6411                | 3231               | 433          | 69           | 0,18                            | 5,3  | L, A, N, T  | N.A   | N.A   | N.A    | N.A    | N.A   | N.A   | 0                    | 1                          | 0                             |
| HP-11    | 78  | F   | 3                   | No            | Yes        | No       | No           | 2732                | 3525               | 645          | 262          | 0,32                            | 26,3 | L, A, T     | 156,0 | 96,4  | 6,6    | 170,1  | 106,5 | N.A   | 1                    | 0                          | 0                             |
| HP-12    | 70  | M   | 3                   | No            | Yes        | Yes      | Yes          | 5965                | 3259               | 459          | 286          | 0,67                            | 3,0  | L, A, T     | N.A   | N.A   | N.A    | N.A    | N.A   | N.A   | 0                    | 0                          | 0                             |
| HP-13    | 65  | M   | 3                   | Yes           | Yes        | Yes      | Yes          | 2005                | 2161               | 517          | 221          | 0,57                            | 8,9  | L, A        | 248,0 | 108,9 | 58,9   | 251,8  | 85,5  | N.A   | 1                    | 0                          | 0                             |
| HP-14    | 52  | M   | 2                   | Yes           | No         | No       | No           | 345                 | 274                | 371          | 34           | 0,25                            | 58,0 | L, A, T     | 259,0 | 51    | 148,6  | 236,2  | 189,6 | 476   | 1                    | 0                          | 0                             |
| HP-15    | 58  | M   | 3                   | No            | No         | No       | No           | 1995                | 2426               | 499          | 112          | 0,17                            | 30,8 | L, A        | 60,0  | 33    | < 1,6  | 29,9   | 29,6  | 1338  | 2                    | 1                          | 1                             |
| HP-16    | 66  | M   | 3                   | Yes           | Yes        | Yes      | Yes          | 3844                | 2991               | 602          | 88           | 0,63                            | 20,2 | L, A        | 49    | 22,9  | 19,5   | 147,3  | 49,7  | N.A   | 2                    | 0                          | 0                             |
| HP-17    | 48  | M   | 2                   | Yes           | Yes        | No       | No           | 1448                | 1849               | 402          | 71           | 0,74                            | 6,4  | L, A        | N.A   | N.A   | N.A    | N.A    | N.A   | N.A   | 2                    | 0                          | 0                             |
| HP-18    | 42  | M   | 2                   | No            | No         | No       | No           | 6198                | 321                | 458          | 99           | 0,75                            | 8,2  | L           | 158,8 | 42,9  | 28,1   | 333    | 125,7 | N.A   | 0                    | 0                          | 0                             |
| HP-19    | 20  | F   | 2                   | No            | No         | No       | No           | 8825                | 3302               | 1075         | N.A          | 0,29                            | 40,0 | L, T        | N.A   | N.A   | N.A    | N.A    | N.A   | N.A   | 0                    | 1                          | 0                             |
| HP-20    | 76  | F   | 2                   | No            | No         | Yes      | Yes          | 1088                | 1623               | 542          | 66           | 1,8                             | 6,0  | A, T        | 22,5  | 11,3  | 2,7    | 49,4   | 17    | N.A   | 1                    | 0                          | 1                             |
| HP-21    | 58  | M   | 2                   | No            | No         | No       | No           | 11872               | 445                | 514          | 52           | 0,69                            | 5,4  | L, A        | 149   | 21,5  | 14,7   | 143,6  | 14,4  | N.A   | 1                    | 0                          | 0                             |
| HP-22    | 19  | M   | 2                   | No            | No         | No       | No           | 515                 | 2746               | 491          | 47           | 0,49                            | 29,6 | L           | 88    | 71,5  | 3,8    | 379,7  | 39,6  | 579   | 0                    | 0                          | 0                             |
| HP-23    | 73  | M   | 2                   | No            | Yes        | No       | Yes          | 125542              | 3204               | 2435         | 905          | 0,2                             | 94,0 | L, A, T     | 21,6  | 1,8   | 4,9    | 43,7   | 1,2   | 814   | 1                    | 1                          | 0                             |
| HP-24    | 51  | F   | 3                   | Yes           | No         | No       | No           | 1921                | 451                | 503          | 115          | 0,8                             | 18,5 | L           | 32    | 11,1  | 6,6    | 90,6   | 94,6  | N.A   | 1                    | 1                          | 0                             |
| HP-25    | 55  | M   | 2                   | No            | Yes        | Yes      | Yes          | 2290                | 2503               | 705          | 62           | 0,42                            | 11,9 | L, A        | 33,4  | 11,6  | 3,1    | 64,9   | 16,1  | N.A   | 2                    | 0                          | 1                             |
| HP-26    | 66  | M   | 2                   | No            | Yes        | Yes      | Yes          | 2432                | 797                | 1087         | 94           | 0,49                            | 26,9 | L, A        | N.A   | N.A   | N.A    | N.A    | N.A   | N.A   | 2                    | 0                          | 0                             |
| HP-27    | 67  | M   | 3                   | No            | Yes        | No       | No           | 1671                | 2727               | 394          | 76           | 0,49                            | 18,5 | L           | N.A   | N.A   | N.A    | N.A    | N.A   | N.A   | 1                    | 1                          | 0                             |
| HP-28    | 59  | F   | 2                   | No            | Yes        | No       | No           | 1308                | 2025               | 674          | 78           | 0,42                            | 1,4  | L, A, N T   | N.A   | N.A   | N.A    | N.A    | N.A   | N.A   | 1                    | 1                          | 0                             |
| HP-29    | 57  | F   | 3                   | No            | Yes        | No       | No           | 605                 | 508                | 601          | 60           | 0,43                            | 17,1 | L           | 2213  | 79,5  | 18,3   | 602,6  | 188,5 | N.A   | 2                    | 1                          | 0                             |
| HP-30    | 49  | M   | 3                   | Yes           | Yes        | No       | No           | 2860                | 1934               | 598          | 47           | 0,43                            | 52,3 | L, A        | N.A   | N.A   | N.A    | N.A    | N.A   | N.A   | 1                    | 0                          | 0                             |
| HP-31    | 48  | M   | 3                   | No            | Yes        | No       | No           | 3905                | 1043               | 603          | 52           | 0,49                            | 16,8 | L           | 85,0  | 76,4  | 3,1    | 176    | 26,2  | 488   | 1                    | 0                          | 0                             |
| HP-32    | 70  | M   | 2                   | Yes           | No         | No       | No           | 11674               | 1593               | 404          | 59           | 0,51                            | 11,5 | L, A, T     | 31    | 1,8   | 13,1   | 27,9   | 19,9  | N.A   | 2                    | 1                          | 0                             |
| HP-33    | 32  | M   | 3                   | Yes           | Yes        | Yes      | Yes          | 3688                | 3524               | 611          | 64           | 0,56                            | 10,7 | L           | N.A   | N.A   | N.A    | N.A    | N.A   | N.A   | 1                    | 0                          | 1                             |
| HP-34    | 63  | M   | 3                   | No            | Yes        | No       | Yes          | 6122                | 1401               | 609          | 131          | 0,44                            | 4,3  | L, T        | 1829  | 86,2  | 4,9    | 2578,9 | 103,4 | N.A   | 2                    | 0                          | 0                             |
| HP-35    | 57  | M   | 2                   | No            | Yes        | No       | No           | 4293                | 651                | 331          | 98           | 0,64                            | 18,0 | L           | N.A   | N.A   | N.A    | N.A    | N.A   | N.A   | 0                    | 0                          | 0                             |
| HP-36    | 73  | M   | 2                   | No            | No         | No       | Yes          | 2008                | 501                | 408          | 74           | 0,46                            | 20,1 | L, A        | N.A   | N.A   | N.A    | N.A    | N.A   | N.A   | 2                    | 1                          | 0                             |
| HP-37    | 69  | M   | 2                   | No            | No         | No       | No           | 4063                | 3595               | 405          | 70           | 0,29                            | 6,9  | L, A        | N.A   | N.A   | N.A    | N.A    | N.A   | N.A   | 2                    | 0                          | 0                             |
| HP-38    | 54  | M   | 2                   | Yes           | Yes        | No       | Yes          | 2598                | 825                | 393          | 55           | 0,49                            | 14,0 | L, A        | N.A   | N.A   | N.A    | N.A    | N.A   | N.A   | 0                    | 0                          | 1                             |
| HP-39    | 69  | M   | 3                   | No            | no         | No       | No           | 567                 | 3377               | 600          | 54           | N.A                             | N.A  | A           | 2100  | 479,9 | 431    | 451,9  | 329   | 1327  | 2                    | 0                          | 1                             |
| HP-40    | 75  | M   | 2                   | No            | No         | No       | Yes          | 1190                | 251                | 305          | 66           | 1,05                            | 6,1  | Low E       | N.A   | N.A   | N.A    | N.A    | N.A   | N.A   | 2                    | 0                          | 0                             |
| HP-41    | 59  | F   | 3                   | No            | No         | No       | No           | 2235                | 749                | 505          | 31           | 0,67                            | 9,4  | L, A, Low E | N.A   | N.A   | N.A    | N.A    | N.A   | N.A   | 1                    | 1                          | 0                             |
| HP-42    | 61  | F   | 2                   | Yes           | Yes        | Yes      | Yes          | 1103                | 2142               | 405          | 50           | 0,8                             | 14,5 | L, Low E    | N.A   | N.A   | N.A    | N.A    | N.A   | N.A   | 0                    | 0                          | 0                             |
| HP-43    | 54  | M   | 2                   | No            | Yes        | No       | No           | 1280                | 156                | 291          | 42           | 0,87                            | 8,8  | L, Low E    | N.A   | N.A   | N.A    | N.A    | N.A   | N.A   | 0                    | 0                          | 1                             |
| HP-44    | 59  | M   | 2                   | No            | No         | No       | No           | 2487                | 8329               | 471          | 42           | 0,58                            | 8,4  | L, A, Low E | N.A   | N.A   | N.A    | N.A    | N.A   | N.A   | 2                    | 0                          | 0                             |
| HP-45    | 80  | F   | 2                   | No            | Yes        | Yes      | Yes          | 1957                | 253                | 558          | 48           | 0,87                            | 12,3 | L, A, Low E | N.A   | N.A   | N.A    | N.A    | N.A   | N.A   | 1                    | 0                          | 0                             |
| HP-46    | 54  | M   | 2                   | Yes           | Yes        | No       | No           | 2197                | 521                | 318          | 71           | 0,64                            | 10,7 | L, Low E    | N.A   | N.A   | N.A    | N.A    | N.A   | N.A   | 0                    | 0                          | 0                             |
| HP-47    | 61  | M   | 2                   | No            | NO         | NO       | Yes          | 4012                | 108                | 357          | 25           | 0,61                            | 4,0  | L, Low E    | N.A   | N.A   | N.A    | N.A    | N.A   | N.A   | 1                    | 0                          | 0                             |
| HP-48    | 70  | M   | 2                   | No            | Yes        | No       | Yes          | 388                 | 829                | 296          | 67           | 0,68                            | 28,5 | L, A, Low E | N.A   | N.A   | N.A    | N.A    | N.A   | N.A   | 1                    | 0                          | 0                             |
| HP-49    | 66  | M   | 2                   | No            | Yes        | Yes      | Yes          | 698                 | 483                | 354          | 42           | 0,35                            | 17,9 | L           | N.A   | N.A   | N.A    | N.A    | N.A   | N.A   | 0                    | 0                          | 0                             |
| HP-50    | 55  | M   | 2                   | No            | No         | Yes      | No           | 1837                | 284                | 499          | 44           | 0,65                            | 5,8  | L, Low E    | N.A   | N.A   | N.A    | N.A    | N.A   | N.A   | 2                    | 1                          | 0                             |
| HP-51    | 68  | F   | 2                   | Yes           | Yes        | NO       | No           | 601                 | 479                | 329          | 95           | 1,09                            | 5,3  | A, Low E    | N.A   | N.A   | N.A    | N.A    | N.A   | N.A   | 1                    | 0                          | 0                             |
| HP-52    | 59  | F   | 2                   | Yes           | Yes        | NO       | No           | 1308                | 2025               | 674          | 78           | 0,42                            | 1,2  | L, T, N, A  | N.A   | N.A   | N.A    | N.A    | N.A   | N.A   | 1                    | 1                          | 0                             |

**Table S1. Age, sex, Symptomatology classification, comorbidities, laboratory data and genetic risk markers of Hyperinflammatory patients.** Current age (years) and gender (M: male, F: female). Symptomatology classification (2: Severe or 3: Critical COVID-19 infection). Presence (Yes) or absence (No) of the following comorbidities: Obesity (Body mass index >30), dyslipemia, diabetes and hypertension. Laboratory data included serum levels of ferritin, D-dimer, Lactate dehydrogenase (LDH) and Aspartate aminotransferase (AST). Absolute lymphocyte (Lymph) counts, Neutrophil-lymphocyte ratio (NLR), Cytopenias (L: lymphopenia, A: anemia, T: thrombocytopenia, N: neutropenia, Low E: low eosinophil counts). Serum cytokines levels of IL-6, IL-10, IL-1β, IL-1Ra, IL-18 and soluble interleukin 2 receptor (sCD25). Presence (1: variant in an heterozygous state, 2: variant in an homozygous state) or absence (0: not variant) of rs1231123A/A-rs1231122A/A *MEFV* haplotype (*MEFV* AA/AA) and p.Phe8Ser\_ *IFNAR2* and p.Val181Met\_ *CARMIL2* variants. N.A: Not available

| PATIENTS   | Age | Sex | Symptomatology      | Comorbidities |            |          |              | Genetic risk markers |                            |                               |
|------------|-----|-----|---------------------|---------------|------------|----------|--------------|----------------------|----------------------------|-------------------------------|
|            |     |     |                     | Obesity       | Dyslipemia | Diabetes | Hypertension | <i>MEFV</i><br>AA/AA | <i>IFNAR2</i><br>p.Phe8Ser | <i>CARMIL2</i><br>p.Val181Met |
| AM-RISK-1  | 98  | M   | Asymptomatic        | No            | No         | No       | No           | 0                    | 0                          | 0                             |
| AM-RISK-2  | 94  | F   | Asymptomatic        | No            | Yes        | Yes      | Yes          | 1                    | 0                          | 0                             |
| AM-RISK-3  | 91  | F   | Asymptomatic        | No            | No         | No       | No           | 0                    | 0                          | 0                             |
| AM-RISK-4  | 85  | M   | Asymptomatic        | No            | No         | No       | No           | 1                    | 1                          | 0                             |
| AM-RISK-5  | 99  | F   | Asymptomatic        | No            | No         | No       | Yes          | 1                    | 0                          | 0                             |
| AM-RISK-6  | 90  | F   | Asymptomatic        | No            | Yes        | No       | Yes          | 2                    | 0                          | 0                             |
| AM-RISK-7  | 100 | F   | Asymptomatic        | No            | Yes        | No       | No           | 0                    | 0                          | 0                             |
| AM-RISK-8  | 91  | F   | Asymptomatic        | No            | No         | No       | No           | 0                    | 0                          | 0                             |
| AM-RISK-9  | 81  | F   | Asymptomatic        | No            | No         | No       | Yes          | 1                    | 0                          | 0                             |
| AM-RISK-10 | 89  | F   | Asymptomatic        | No            | No         | No       | Yes          | 1                    | 0                          | 0                             |
| AM-RISK-11 | 70  | M   | Asymptomatic        | Yes           | No         | Yes      | Yes          | 1                    | 0                          | 0                             |
| AM-RISK-12 | 88  | M   | Asymptomatic        | No            | No         | Yes      | Yes          | 1                    | 0                          | 0                             |
| AM-RISK-13 | 93  | F   | Asymptomatic        | N.A           | No         | Yes      | Yes          | 0                    | 0                          | 0                             |
| AM-RISK-14 | 98  | F   | Fatigue             | N.A           | No         | No       | Yes          | 1                    | 0                          | 0                             |
| AM-RISK-15 | 95  | F   | Asymptomatic        | N.A           | Yes        | No       | Yes          | 1                    | 0                          | 0                             |
| AM-RISK-16 | 81  | F   | Asymptomatic        | N.A           | No         | No       | No           | 0                    | 0                          | 0                             |
| AM-RISK-17 | 70  | M   | Fatigue             | Yes           | No         | Yes      | Yes          | 1                    | 0                          | 0                             |
| AM-RISK-18 | 78  | F   | Fatigue             | N.A           | No         | Yes      | Yes          | 0                    | 0                          | 0                             |
| AM-RISK-19 | 90  | M   | Fatigue             | No            | No         | No       | Yes          | 2                    | 0                          | 0                             |
| AM-RISK-20 | 81  | F   | Throat pain         | N.A           | No         | Yes      | No           | 0                    | 0                          | 0                             |
| AM-RISK-21 | 70  | M   | Fatigue             | N.A           | Yes        | Yes      | Yes          | 1                    | 0                          | 0                             |
| AM-RISK-22 | 90  | F   | Asymptomatic        | Yes           | Yes        | No       | Yes          | 0                    | 0                          | 0                             |
| AM-RISK-23 | 81  | F   | Fever/Fatigue       | No            | No         | No       | No           | 2                    | 1                          | 0                             |
| AM-RISK-24 | 85  | M   | Asymptomatic        | No            | No         | No       | No           | 1                    | 0                          | 0                             |
| AM-RISK-25 | 88  | F   | Asymptomatic        | No            | No         | No       | No           | 1                    | 0                          | 0                             |
| AM-RISK-26 | 85  | F   | Asymptomatic        | No            | No         | No       | Yes          | 2                    | 0                          | 0                             |
| AM-RISK-27 | 97  | F   | Asymptomatic        | No            | No         | No       | No           | 1                    | 1                          | 0                             |
| AM-RISK-28 | 81  | F   | Asymptomatic        | Yes           | No         | No       | Yes          | 1                    | 0                          | 0                             |
| AM-RISK-29 | 85  | M   | Asymptomatic        | No            | Yes        | Yes      | Yes          | 1                    | 0                          | 0                             |
| AM-RISK-30 | 86  | F   | Asymptomatic        | No            | No         | No       | Yes          | 1                    | 0                          | 0                             |
| AM-RISK-31 | 80  | F   | Asymptomatic        | No            | No         | No       | No           | 2                    | 0                          | 0                             |
| AM-RISK-32 | 78  | M   | Fever/Fatigue       | No            | No         | No       | Yes          | 1                    | 0                          | 0                             |
| AM-RISK-33 | 81  | M   | Asymptomatic        | Yes           | Yes        | No       | Yes          | 1                    | 0                          | 0                             |
| AM-RISK-34 | 88  | F   | Asymptomatic        | Yes           | No         | No       | Yes          | 1                    | 0                          | 0                             |
| AM-RISK-35 | 85  | M   | Asymptomatic        | Yes           | Yes        | No       | No           | 1                    | 0                          | 0                             |
| AM-RISK-36 | 81  | F   | Cough/ throat pain  | N.A           | No         | No       | Yes          | 1                    | 0                          | 0                             |
| AM-RISK-37 | 74  | F   | Throat pain/Fatigue | N.A           | Yes        | Yes      | No           | 1                    | 0                          | 0                             |
| AM-RISK-38 | 89  | F   | Cough/ throat pain  | N.A           | No         | No       | No           | 1                    | 0                          | 0                             |
| AM-RISK-39 | 71  | M   | Fatigue             | N.A           | No         | No       | Yes          | 2                    | 0                          | 0                             |
| AM-RISK-40 | 75  | M   | Fever               | N.A           | No         | No       | Yes          | 1                    | 0                          | 0                             |

**Table S2. Age, sex, symptomatology, comorbidities and genetic risk markers of AM-Risk patients.** Current age (years) and gender (M: male, F: female). Symptomatology associated with COVID-19 infection. Presence (Yes) or absence (No) of the following comorbidities: Obesity (Body mass index >30), dyslipemia, diabetes and hypertension. Presence (1: variant in an heterozygous state, 2: variant in an homozygous state) or absence (0: not variant) of rs1231123A/A-rs1231122 A/A *MEFV* haplotype (*MEFV* AA/AA), p.Phe8Ser\_*IFNAR2* and p.Val181Met\_*CARMIL2*. N.A: Not available.
